# Supplementary material for: Decadal impacts of nitrogen additions on temperate forest carbon sinks: A data-model comparison
Source: Copernicus journal article supplement (doi:10.5194/bg-2018-505), 2018-12-19
Supplement: Supplementary file 1 [file bg-2018-505-supplement.pdf]

## Supplementary Information

**Table S1: Published  $^{15}\text{N}$  recovery measurements and model simulation recoveries for each site and experiment, including for both default (def CLM) and adjusted (adj CLM) configurations of CLM5.**

| Site                                    | Years Since Tracer Application | Foliage                           | Wood | Bark      | Fine Roots        | Coarse Roots | Ground Plants | Organic Soil | Mineral Soil | Total Plant* | Total Soil | Def CLM Plant | Adj CLM Plant | Def CLM Soil | Adj CLM Soil |
|-----------------------------------------|--------------------------------|-----------------------------------|------|-----------|-------------------|--------------|---------------|--------------|--------------|--------------|------------|---------------|---------------|--------------|--------------|
| Arnot <sup>a,b</sup>                    | 1                              | 1.9                               | 0.6  | 1.0       | 2.5               | 4.9          | NA            | 13.7         | 45.3         | 10.9         | 59.0       | 50            | 65            | 26           | 33           |
|                                         | 6                              | 1.6                               | 1.5  | 1.2       | 1.8               | 2.1          | NA            | 5.9          | 56.5         | 8.2          | 62.4       | 16            | 24            | 63           | 73           |
| Harvard BDT <sup>c,d,e</sup>            | 1                              | 1.2                               | 0.6  | 0.5       | 4.6               | NA           | NA            | 81.9         | 11.1         | 6.8          | 92.9       | 47            | 63            | 25           | 32           |
|                                         | 8                              | 3.8                               | 2.1  | 1.7       | 4.2               | NA           | NA            | 73.9         | 15.7         | 11.8         | 89.6       | 14            | 23            | 56           | 71           |
|                                         | 17                             | available upon request to site PI |      |           |                   |              |               |              |              |              |            | 14            | 20            | 48           | 72           |
| Harvard BDT Fertilized <sup>c,d,e</sup> | 1                              | 5.9                               | 2.9  | 1.6       | 13.7              | NA           | NA            | 44.6         | 27.4         | 24.0         | 72.0       | 31            | 29            | 26           | 31           |
|                                         | 8                              | 3.1                               | 3.1  | 2.2       | 3.1               | NA           | NA            | 55.4         | 16.0         | 11.5         | 71.4       | 21            | 20            | 34           | 35           |
|                                         | 17                             | available upon request to site PI |      |           |                   |              |               |              |              |              |            | 14            | 15            | 33           | 34           |
| Harvard NET <sup>c,d,e</sup>            | 1                              | 1.0                               | 0.1  | 0.2       | 2.3               | NA           | NA            | 60.0         | 8.8          | 3.6          | 68.7       | 38            | 49            | 51           | 49           |
|                                         | 8                              | 2.9                               | 1.3  | 0.6       | 3.4               | NA           | NA            | 56.2         | 31.9         | 8.1          | 88.1       | 24            | 24            | 58           | 72           |
|                                         | 17                             | available upon request to site PI |      |           |                   |              |               |              |              |              |            | 18            | 16            | 60           | 78           |
| Harvard NET Fertilized <sup>c,d,e</sup> | 1                              | 9.6                               | 0.4  | 0.9       | 8.7               | NA           | NA            | 33.9         | 15.2         | 19.7         | 49.1       | 29            | 36            | 26           | 40           |
|                                         | 8                              | 6.1                               | 1.1  | 0.9       | 5.1               | NA           | NA            | 34.9         | 24.3         | 13.2         | 59.2       | 20            | 26            | 31           | 43           |
|                                         | 17                             | available upon request to site PI |      |           |                   |              |               |              |              |              |            | 16            | 20            | 32           | 45           |
| Alptal <sup>f,g,h</sup>                 | 1                              | 2.3                               | 3.0  | with wood | 6.6               | 0.4          | 19.0          | 25.6         | 19.6         | 12.3         | 45.2       | 39            | 44            | 52           | 50           |
|                                         | 3                              | 0.9                               | 1.0  | with wood | 3.3               | 1.8          | 20.5          | 22.5         | 7.3          | 6.9          | 29.8       | 30            | 34            | 58           | 59           |
|                                         | 9                              | 3.7                               | 2.6  | 2.3       | 3.1               | 1.1          | 3.8           | 42.6         | 13.3         | 12.8         | 55.9       | 29            | 19            | 9            | 70           |
| Alptal Fertilized <sup>f,g,h</sup>      | 2                              | 4.6                               | 3.0  | 0.8       | with organic soil | NA           | 5.0           | 55.0         | 21.0         | 8.4          | 76.0       | 36            | 45            | 54           | 51           |
|                                         | 7                              | 6.9                               | 3.9  | 0.8       | 2.6               | 1.4          | 1.5           | 29.3         | 15.4         | 15.6         | 44.7       | 30            | 37            | 55           | 55           |
|                                         | 14                             | 5.0                               | 4.4  | 2.0       | 2.7               | 1.2          | 0.9           | 39.6         | 18.9         | 15.3         | 58.5       | 24            | 31            | 53           | 59           |
| Klosterhede <sup>i</sup>                | 1                              | 9.9                               | 3.3  | 0.4       | 6.9               | 7.0          | 20.1          | 41.5         | 10.4         | 27.4         | 51.8       | 32            | 47            | 52           | 50           |

|                                      |    |      |     |     |      |      |     |      |      |      |      |    |    |    |    |
|--------------------------------------|----|------|-----|-----|------|------|-----|------|------|------|------|----|----|----|----|
|                                      | 17 | 12.0 | 4.6 | 1.2 | 3.4  | 2.3  | 0.2 | 61.6 | 3.8  | 23.5 | 65.4 | 11 | 19 | 45 | 70 |
| Klosterhede Fertilized <sup>d</sup>  | 1  | 16.8 | 6.3 | 0.7 | 11.2 | 10.7 | 3.2 | 23.9 | 22.5 | 45.8 | 46.4 | 38 | 63 | 52 | 34 |
|                                      | 17 | 12.7 | 3.8 | 1.1 | 2.7  | 4.4  | 0.0 | 36.7 | 11.5 | 24.7 | 48.2 | 24 | 25 | 47 | 46 |
| Bear Brook Fertilized <sup>j</sup>   | 3  | 2.4  | 9.1 | NA  | NA   | NA   | NA  | NA   | NA   | 11.4 | 23.3 | 40 | 35 | 27 | 37 |
| Gårdsjön Fertilized <sup>k</sup>     | 2  | NA   | NA  | NA  | NA   | NA   | NA  | NA   | NA   | 28.0 | 82.0 | 39 | 47 | 43 | 37 |
| Aber Low Fertilization <sup>l</sup>  | 3  | NA   | NA  | NA  | NA   | NA   | NA  | 17.0 | 15.0 | 32.0 | 32.0 | 49 | 56 | 29 | 33 |
| Aber High Fertilization <sup>l</sup> | 3  | NA   | NA  | NA  | NA   | NA   | NA  | 11.0 | 15.0 | 20.0 | 26.0 | 32 | 35 | 21 | 25 |

\*plant recovery from field recoveries excludes ground vegetation.

NA: not available

<sup>a</sup>Goodale (2017)

<sup>b</sup>personal communication with C. Goodale

<sup>c</sup>Nadelhoffer et al. (1999b)

<sup>d</sup>Nadelhoffer et al. (2004)

<sup>e</sup>personal communication with K. Nadelhoffer

<sup>f</sup>Krause et al. (2012)

<sup>g</sup>personal communication with P. Schleppi

<sup>h</sup>Providoli et al. (2005) and paper with data from fertilized 1997

<sup>i</sup>Gundersen (1998)

<sup>j</sup>Nadelhoffer et al. (1999a)

<sup>k</sup>Nadelhoffer et al. (1999c)

<sup>l</sup>Tietema et al. (1998)

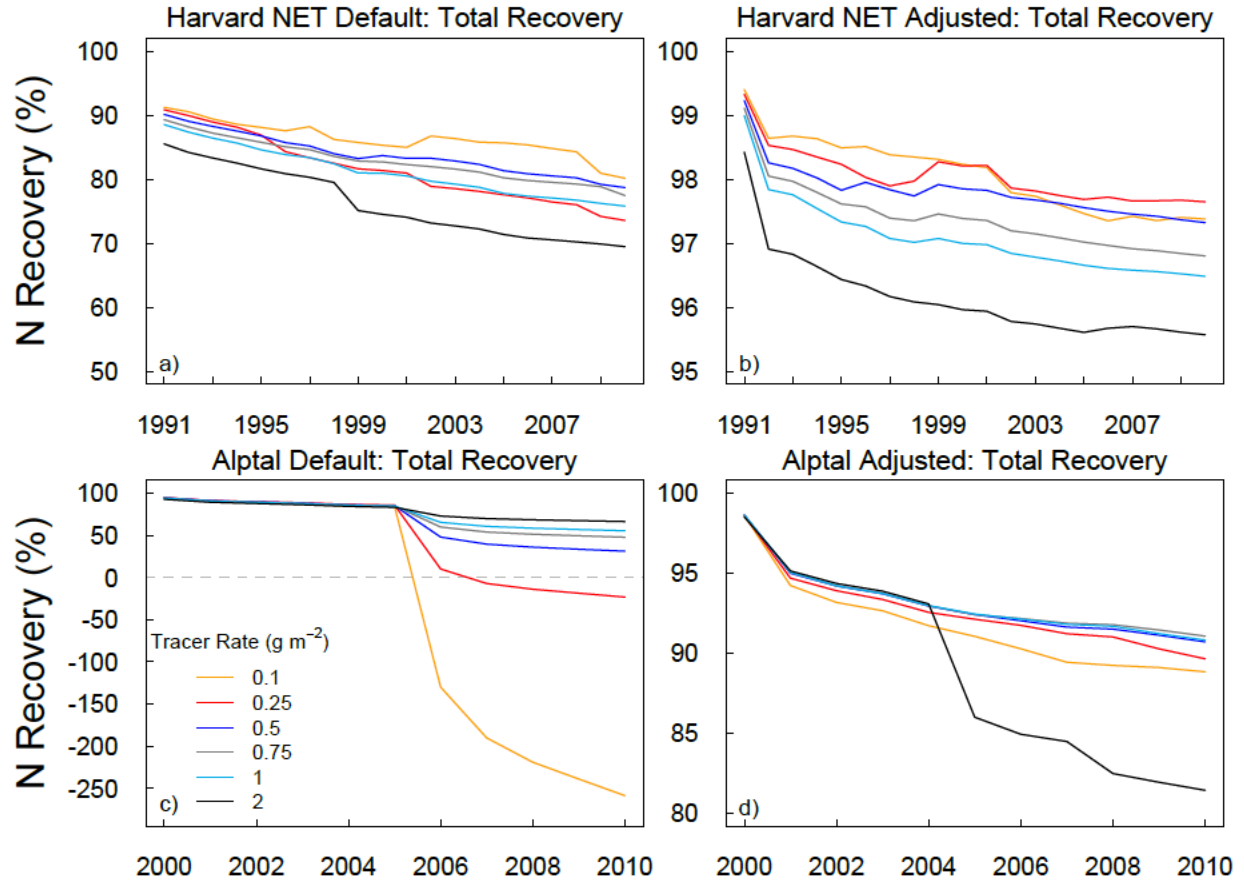

**Figure S1: Results from a sensitivity study done at Harvard (a, b) needleleaf temperate tree (NET) plant functional type (PFT) and Alptal (c, d) on the amount of tracer that should be applied during the growing season (April-September) for the default and adjusted configurations of CLM5.**

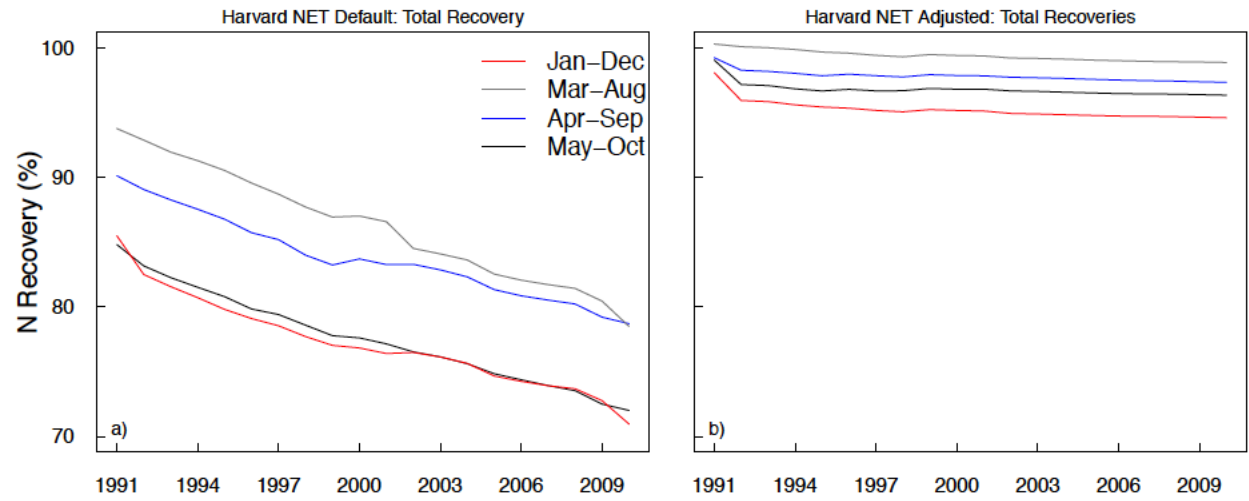

**Figure S2: Results from the sensitivity study at Harvard needleleaf evergreen tree (NET) plant functional type (PFT) on the timing of applying  $0.5 \text{ g N m}^{-2}$  into the a) default and b) adjusted configurations of CLM5.**

**Table S2: Residence time of N in plant, soil, and total ecosystem N pools in the default and adjusted configurations of CLM5. Values shown are averaged across the last 20 years of the 1850 spinup simulation and for the last 20 years of the historical simulation. Residence time is calculated a) for plants as the plant stock divided by losses from litterfall, b) for soils as the soil stock divided by losses from plant uptake, denitrification, leaching, and runoff, and c) for the ecosystem as the ecosystem stock divided by losses from denitrification, leaching, and runoff.**

|                  | 1850               |                     | Last 20 Years      |                     |
|------------------|--------------------|---------------------|--------------------|---------------------|
|                  | Default<br>(years) | Adjusted<br>(years) | Default<br>(years) | Adjusted<br>(years) |
| <b>Plants</b>    |                    |                     |                    |                     |
| Harvard BDT      | 29                 | 30                  | 17.6               | 18.0                |
| Harvard NET      | 72                 | 72                  | 53.6               | 56.8                |
| Arnot            | 29                 | 30                  | 23.7               | 24.5                |
| Aber             | 72                 | 71                  | 42.6               | 42.0                |
| Alptal           | 73                 | 71                  | 64.1               | 58.5                |
| Bear Brook       | 29                 | 30                  | 19.4               | 20.5                |
| Klosterhede      | 72                 | 73                  | 58.0               | 55.1                |
| Gårdsjön         | 73                 | 73                  | 58.9               | 59.0                |
| <b>Soil</b>      |                    |                     |                    |                     |
| Harvard BDT      | 93                 | 114                 | 70                 | 95                  |
| Harvard NET      | 115                | 137                 | 100                | 132                 |
| Arnot            | 143                | 170                 | 122                | 158                 |
| Aber             | 131                | 161                 | 95                 | 101                 |
| Alptal           | 184                | 217                 | 146                | 152                 |
| Bear Brook       | 117                | 136                 | 93                 | 114                 |
| Klosterhede      | 111                | 130                 | 92                 | 98                  |
| Gårdsjön         | 137                | 151                 | 111                | 128                 |
| <b>Ecosystem</b> |                    |                     |                    |                     |
| Harvard BDT      | 501                | 7142                | 578                | 6914                |
| Harvard NET      | 679                | 5238                | 1597               | 16236               |
| Arnot            | 857                | 10606               | 1065               | 12319               |
| Aber             | 658                | 3557                | 441                | 1430                |
| Alptal           | 2023               | 47976               | 1067               | 3127                |
| Bear Brook       | 836                | 7019                | 888                | 6727                |
| Klosterhede      | 596                | 6902                | 542                | 2775                |
| Gårdsjön         | 1084               | 7787                | 873                | 2903                |

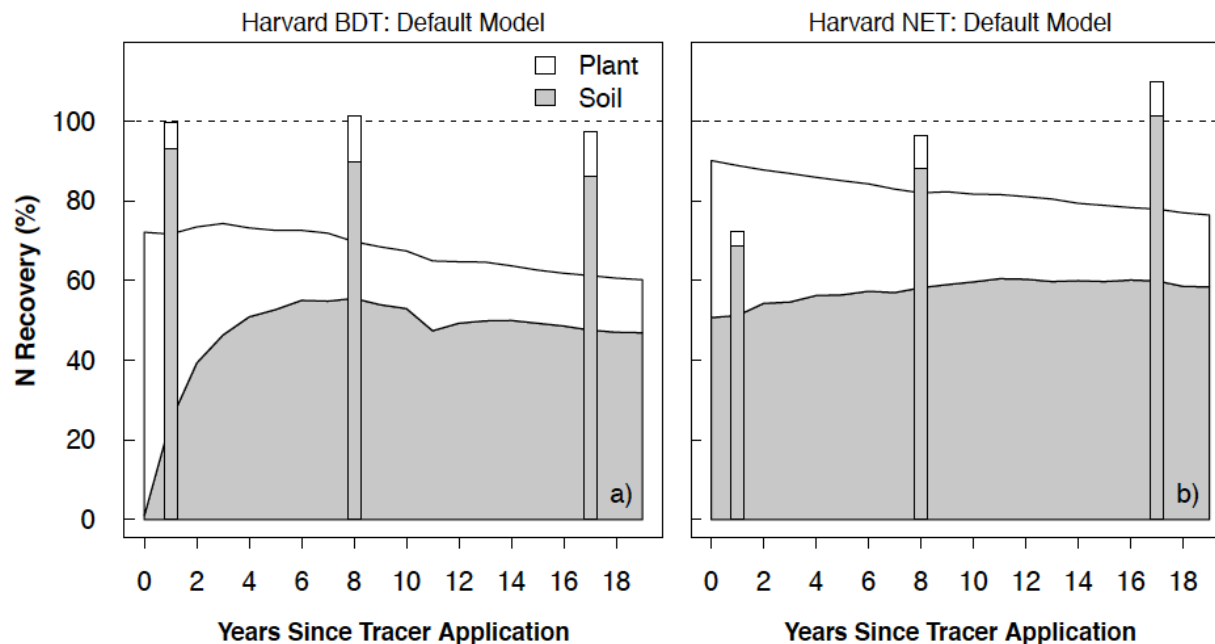

**Figure S3: Modeled recovery of N additions in plant and soil pools in default configurations of CLM5 for ambient N deposition conditions at Harvard Forest a) broadleaf deciduous tree and b) needleleaf evergreen tree plant functional types (PFT). Thin, stacked bars represent observations. Recovery is calculated as the difference in stock size between a baseline simulation and a simulation with a “tracer” added as  $0.5 \text{ g m}^{-2}$  between April-September in the first year a  $^{15}\text{N}$  tracer was applied in the field (see Methods).**

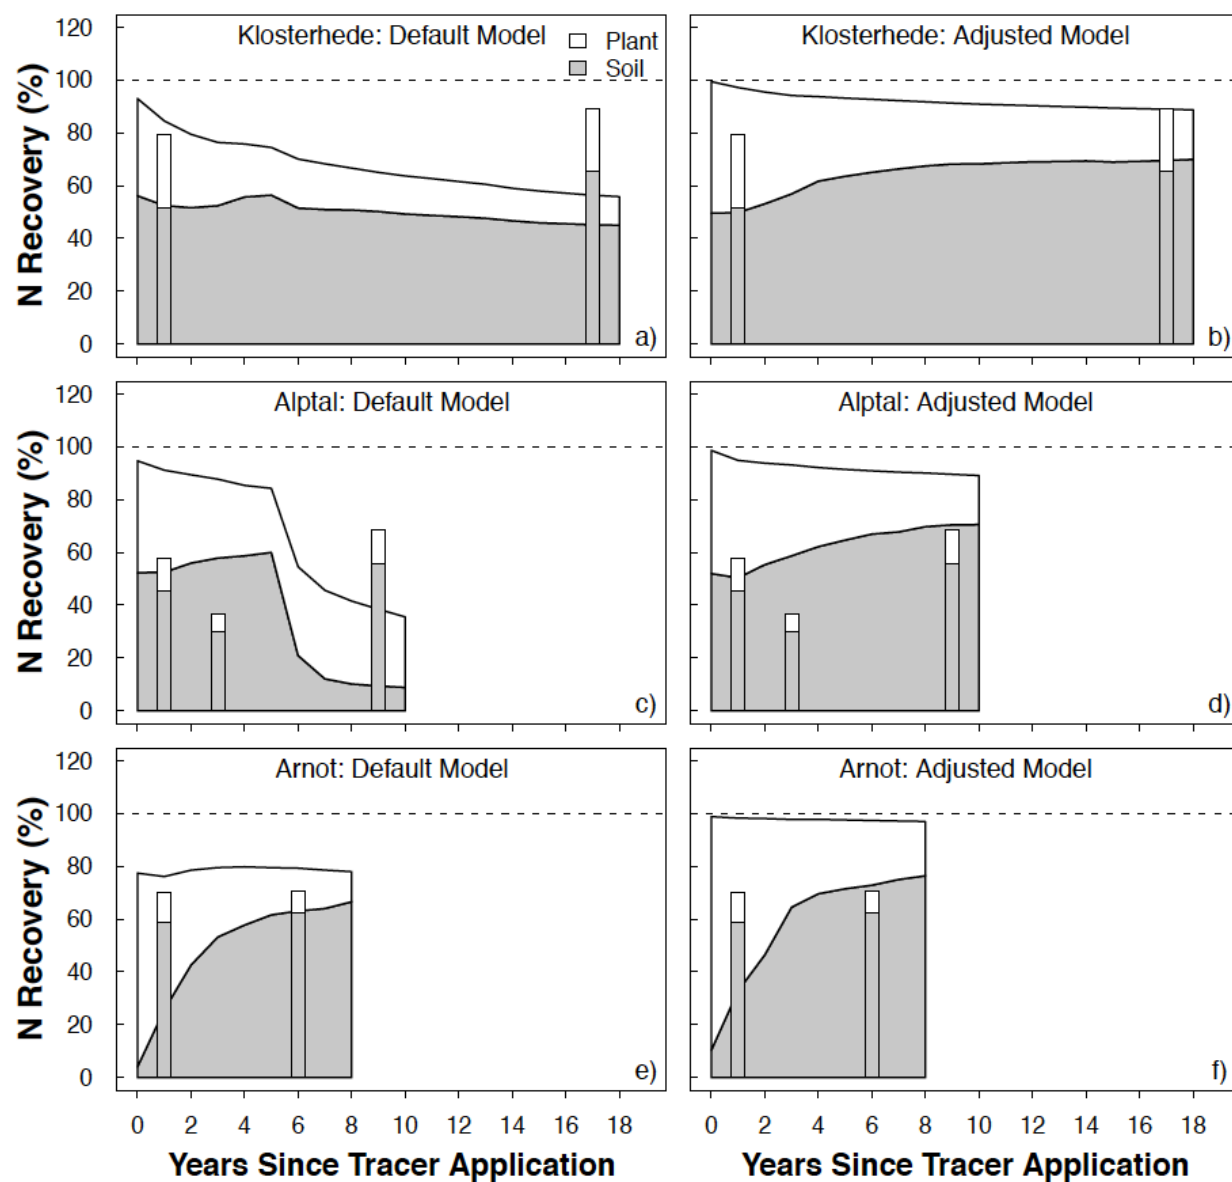

Figure S4: Modeled recovery of N additions in plant and soil pools in default and adjusted configurations of CLM5 for ambient N deposition conditions. Thin, stacked bars represent observations. Recovery is calculated as the difference in stock size between a baseline simulation and a simulation with a “tracer” added as  $0.5 \text{ g m}^{-2}$  between April-September in the first year a  $^{15}\text{N}$  tracer was applied in the field (see Methods).

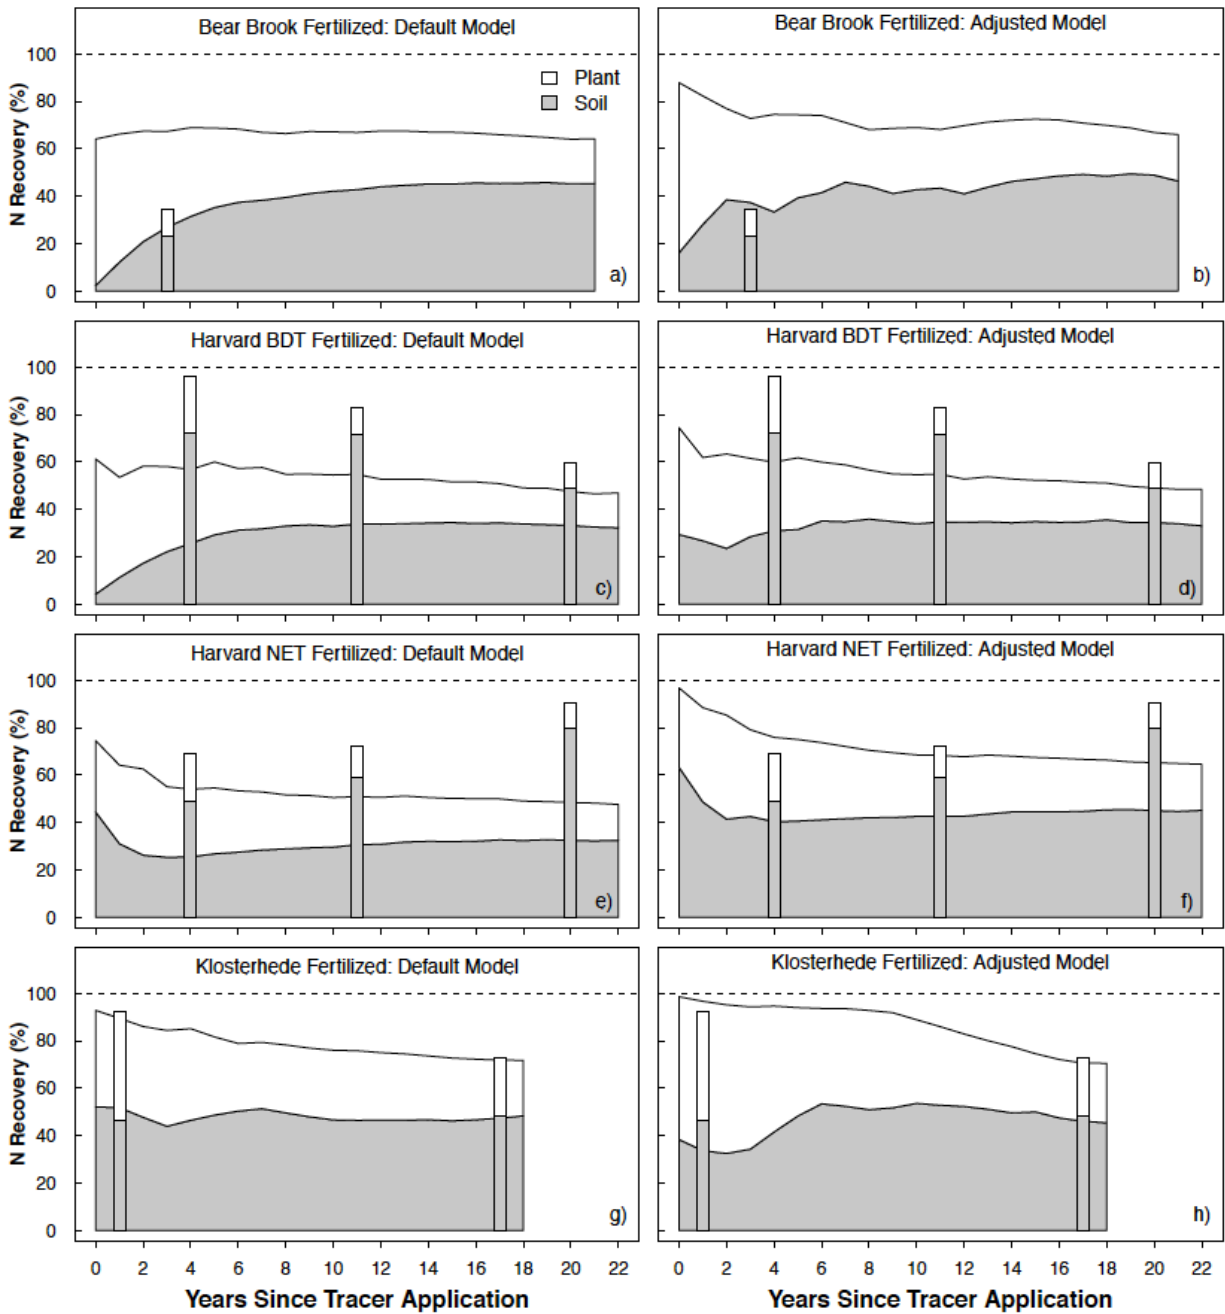

Figure S5: Modeled recovery of N additions in plant and soil pools of sites in default and adjusted configurations of CLM5 compared to field measurements (thin, stacked bars) for sites under multi-year N fertilization. For each scenario, recovery is calculated as the difference in stock size between a baseline simulation and a simulation with N fertilizer added into the soil mineral N pool between April-September (see Methods).



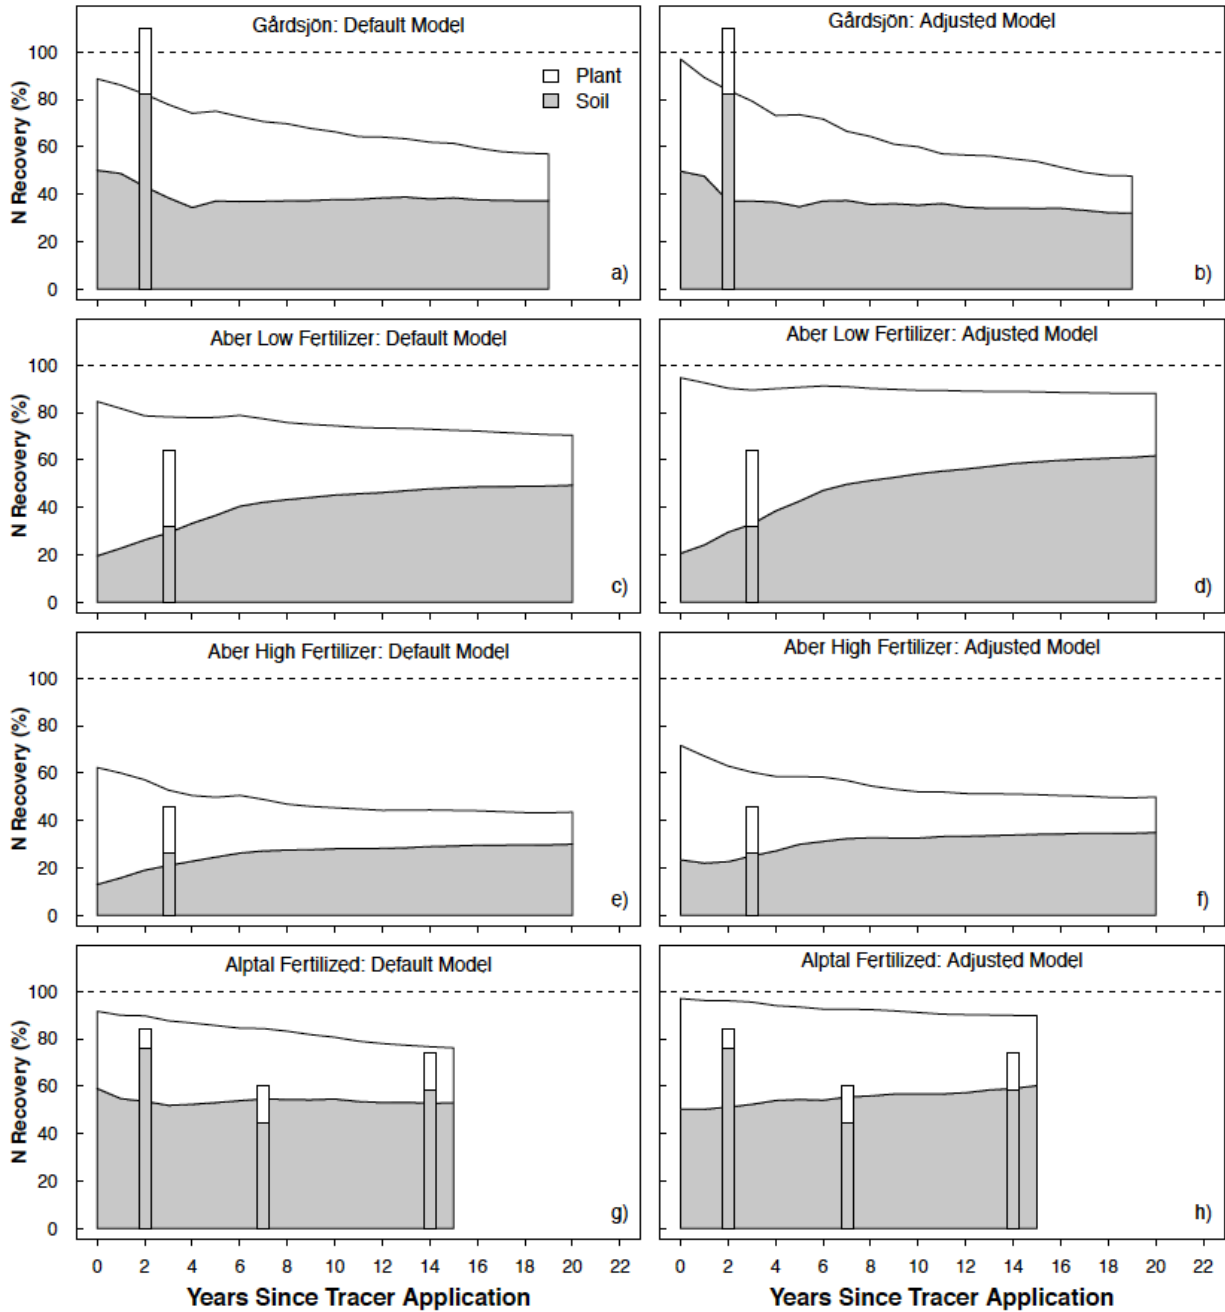

**Figure S6: Modeled recovery of N additions in plant and soil pools of sites in default and adjusted configurations of CLM5 compared to field measurements (thin, stacked bars) for sites under multi-year N fertilization. For each scenario, recovery is calculated as the difference in stock size between a control simulation and a simulation with N fertilizer added into the soil mineral N pool between April-September (see Methods).**

**Table S3: C:N ratios of sub-pools for plants and soils as reported in literature.**

| Site                     | Foliage     | Wood          | Bark         | Fine Roots  | Coarse Roots | Organic Soil | Mineral Soil | Citations                                                                                                            |
|--------------------------|-------------|---------------|--------------|-------------|--------------|--------------|--------------|----------------------------------------------------------------------------------------------------------------------|
| Harvard BDT              | 25          | 338           | 126          | 50          | NA           | 24           | 20           | Nadelhoffer et al., 2004; Nadelhoffer et al. 1999                                                                    |
| Harvard NET              | 42          | 337           | 253          | 41          | NA           | 25           | 19           | Nadelhoffer et al., 2004; Nadelhoffer et al. 1999                                                                    |
| Arnot                    | 35          | 638           | 154          | 47          | 109          | 39           | 9            | Goodale 2017                                                                                                         |
| Alptal <sup>a</sup>      | 42          | 500           | 167          | 56          | 91           | 19           | 17           | Provioldi et al. 2005                                                                                                |
| Klosterhede <sup>b</sup> | 63          | 333           | 200          | 52          | 70           | 33           | 29           | Emmett 1998 (FEM), Gundersen and Rasmussen 1995, Tietema et al. 1998 (FEM), personal communication with P. Gundersen |
| Harvard BDT Fertilized   | 23          | 321           | 120          | 48          | NA           | 21           | 23           | Nadelhoffer et al., 2004; Nadelhoffer et al. 1999                                                                    |
| Harvard NET Fertilized   | 35          | 409           | 253          | 24          | NA           | 23           | 26           | Nadelhoffer et al., 2004; Nadelhoffer et al. 1999                                                                    |
| Bear Brook Fertilized    | 37          | 413           | NA           | NA          | NA           | 23           | 19           | Nadelhoffer et al. 1999                                                                                              |
| Gårdsjön                 | NA          | NA            | NA           | NA          | NA           | 32           | 31           | Emmett 1998, FEM                                                                                                     |
| Aber <sup>b</sup>        | 28          | NA            | NA           | NA          | NA           | 22           | 18           | Emmett 1998, FEM                                                                                                     |
| Mean $\pm$ 1 SD          | 37 $\pm$ 12 | 411 $\pm$ 110 | 182 $\pm$ 55 | 45 $\pm$ 10 | 90 $\pm$ 20  | 26 $\pm$ 6   | 21 $\pm$ 6   |                                                                                                                      |

NA: not available from literature

<sup>a</sup>C:N ratios of all plant subpools at Alptal were estimated by assuming 50% of biomass is carbon, and then dividing by the N concentration reported in the literature.

<sup>b</sup>C:N ratios for foliage at Aber were estimated by assuming 50% of biomass is carbon, and then dividing by the N concentration reported in the literature.
